# Supplementary material for: Role of rare earth ions in the magnetic, magnetocaloric and magnetoelectric properties of RCrO3 (R = Dy, Nd, Tb, Er) crystals
Source: Royal Society of Chemistry journal article supplement (doi:10.1039/c6tc03989h), 2016-01-01
Supplement: c6tc03989h1.pdf [file c6tc03989h1.pdf]

## Supporting information for

# Role of rare earth in the magnetic, magnetocaloric and magnetoelectric properties in $R\text{CrO}_3$ ( $R = \text{Dy}, \text{Nd}, \text{Tb}, \text{Er}$ ) crystals

L. H. Yin,<sup>\*a</sup> J. Yang,<sup>a</sup> P. Tong,<sup>a</sup> X. Luo,<sup>a</sup> C. B. Park,<sup>b</sup> K. W. Shin,<sup>b</sup> W. H. Song,<sup>a</sup> J. M. Dai,<sup>a</sup> K. H. Kim,<sup>b</sup> X. B. Zhu,<sup>a</sup> and Y. P. Sun<sup>\*cad</sup>

<sup>a</sup>Key Laboratory of Materials Physics, Institute of Solid State Physics, Chinese Academy of Sciences, Hefei 230031, People's Republic of China

<sup>b</sup>Center for Novel States of Complex Materials (CeNSCMR) and Institute of Applied Physics, Department of Physics and Astronomy, Seoul National University, Seoul 151-747, Korea

<sup>c</sup>High Magnetic Field Laboratory, Chinese Academy of Sciences, Hefei 230031, People's Republic of China

<sup>d</sup>Collaborative Innovation Center of Advanced Microstructures, Nanjing University, Nanjing 210093, People's Republic of China

\* To whom all correspondence should be addressed. E-mail: [ypsun@issp.ac.cn](mailto:ypsun@issp.ac.cn) and [lhyin@issp.ac.cn](mailto:lhyin@issp.ac.cn)

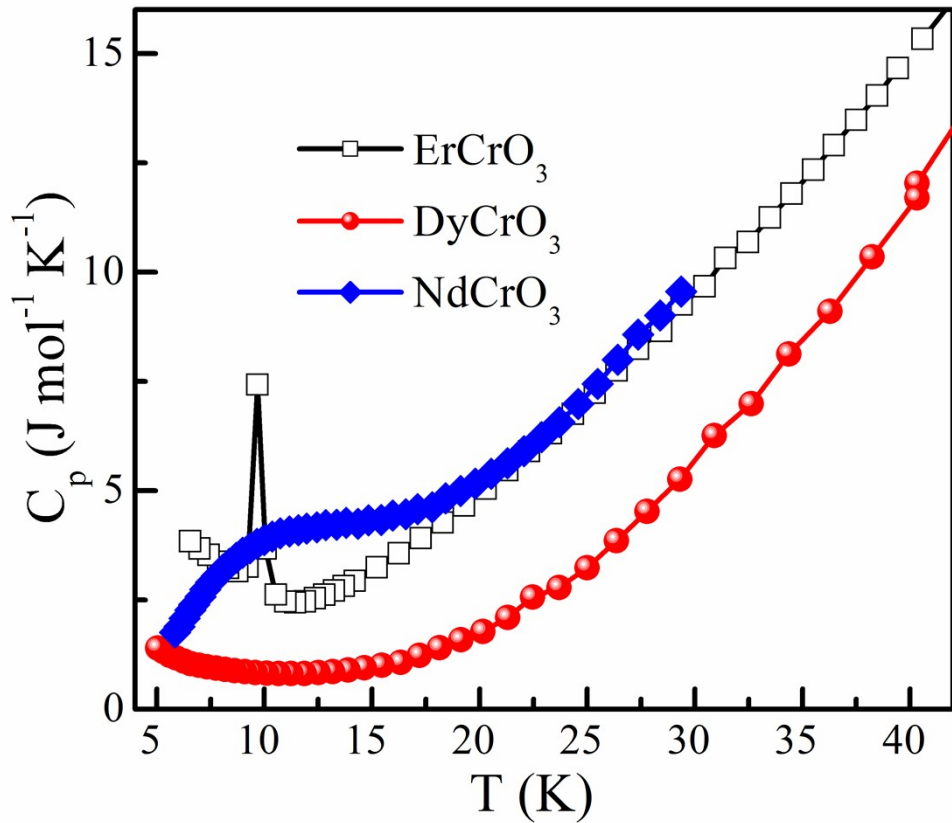

Figure S1 temperature dependent specific heat for  $RCrO_3$  ( $R=\text{Dy}, \text{Nd}, \text{Er}$ ) crystals.

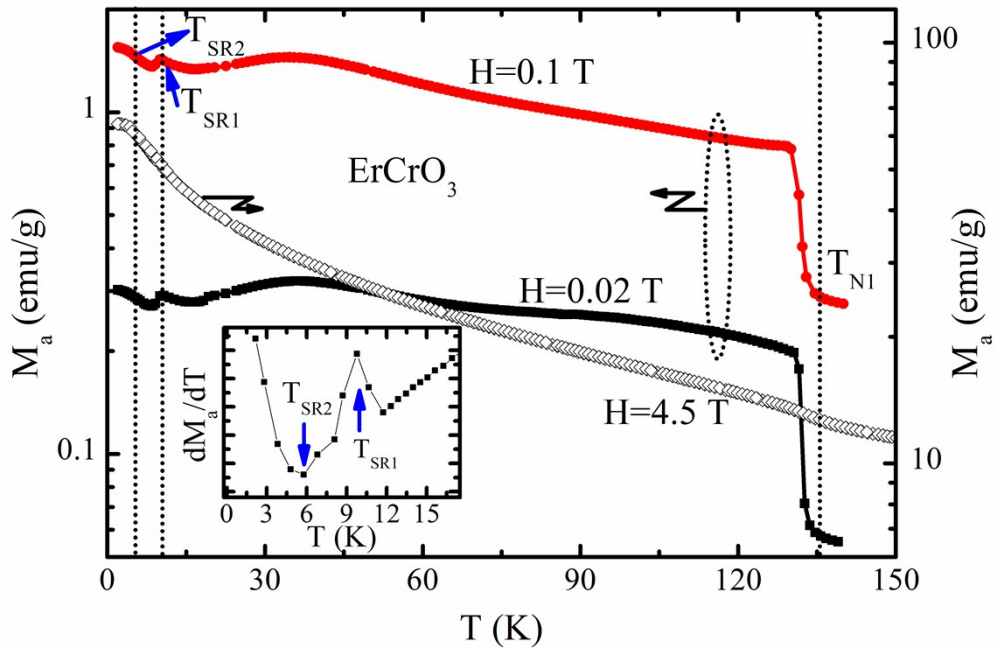

Figure S2 Temperature dependent magnetization under different  $H$  along  $a$  axis for  $\text{ErCrO}_3$  crystals. Inset is the derivative  $M_a$  with respect to  $T$  at  $H=0.02 \text{ T}$ , which indicates the two magnetic transitions around  $T_{SR1}$  and  $T_{SR2}$ .

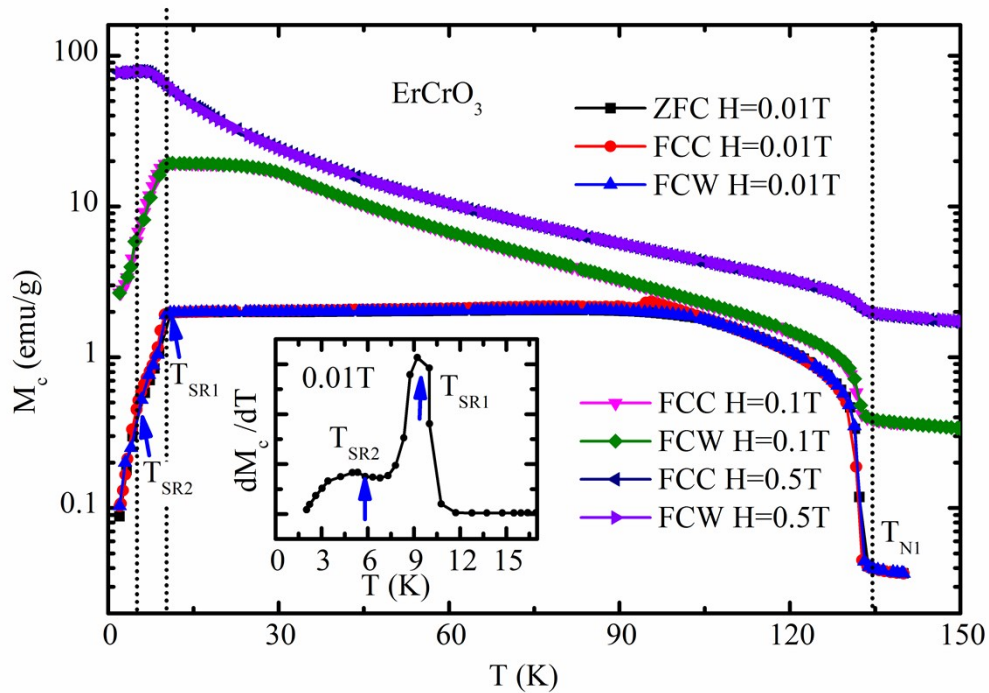

Figure S3 Temperature dependent magnetization under different  $H$  along  $c$  axis for  $\text{ErCrO}_3$  crystals. The  $H$ -induced magnetic transition below  $T_{\text{SR1}}$  is obviously manifested by the gradual upturn of  $M_c$  under high  $H$ . Inset is the derivative  $M_c$  with respect to  $T$  at  $H=0.1\text{T}$ , which indicates the two magnetic transitions around  $T_{\text{SR1}}$  and  $T_{\text{SR2}}$ .

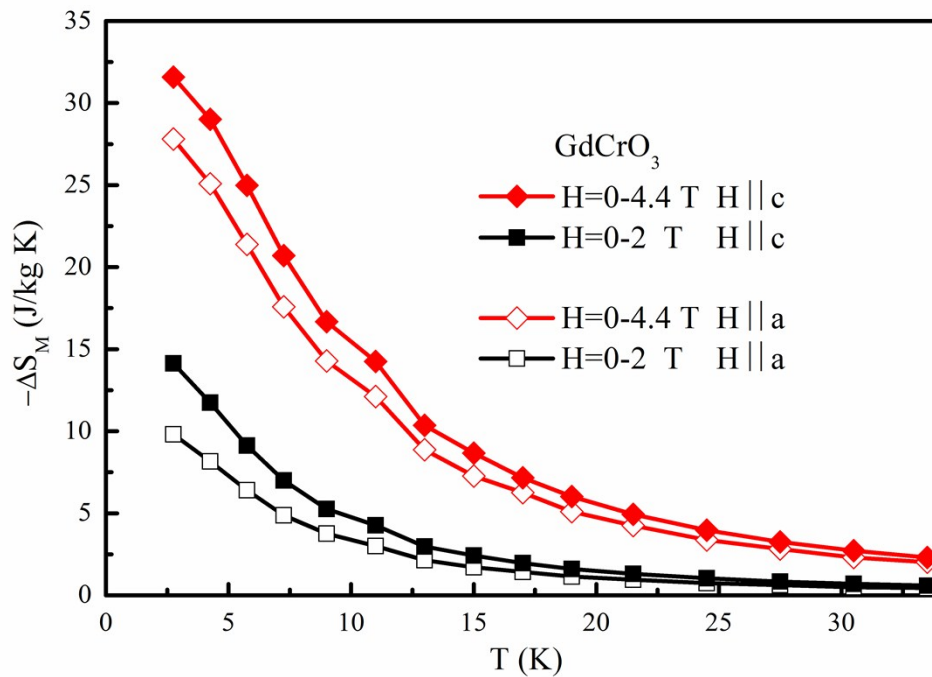

Figure S4 Magnetocaloric effect as a function of temperature along different axes for  $\text{GdCrO}_3$  crystals.

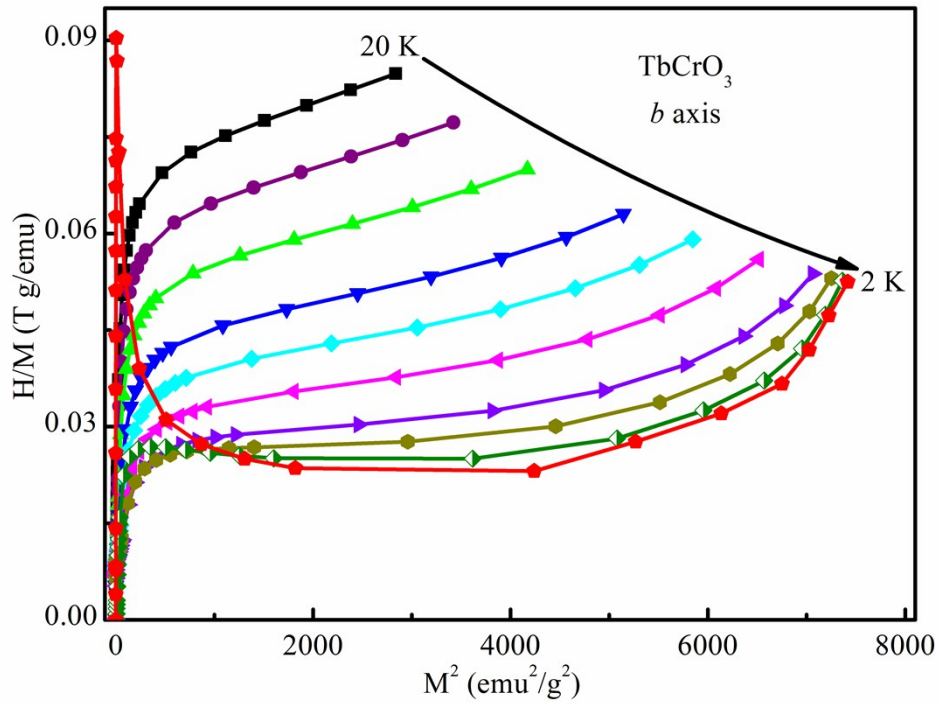

Figure S5 Arrott plots transformed from the isothermal magnetization ( $M-H$ ) data along  $b$  axis for  $\text{TbCrO}_3$  crystals. The slope of the Arrott plot becoming negative below  $\sim T_{N2}$  is clearly shown.

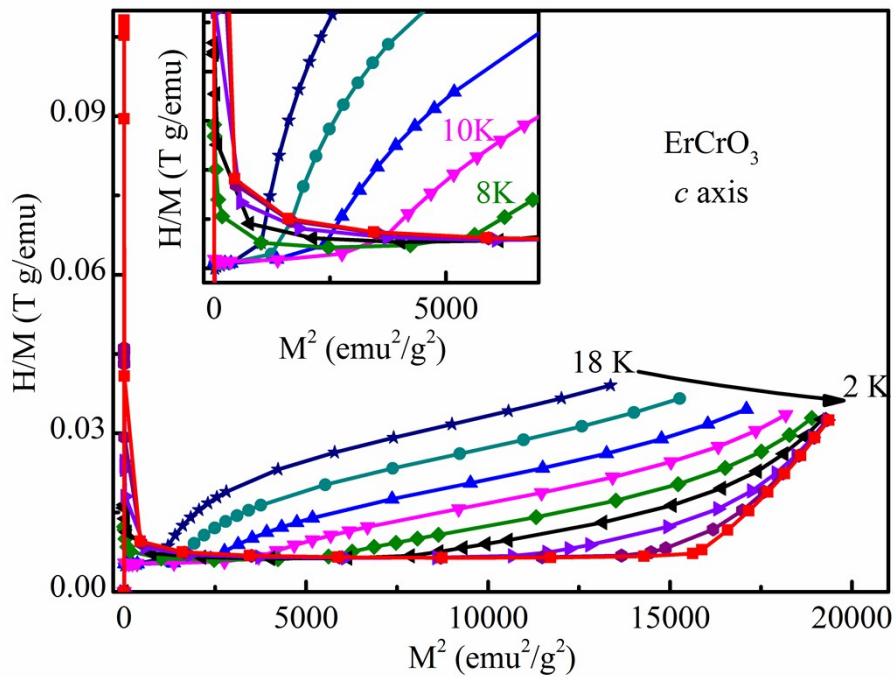

Figure S6 Arrott plots transformed from the isothermal magnetization ( $M-H$ ) data along  $c$  axis for  $\text{ErCrO}_3$  crystals. The slope of the Arrott plot becomes negative below  $T_{SR1} \sim 10$  K.

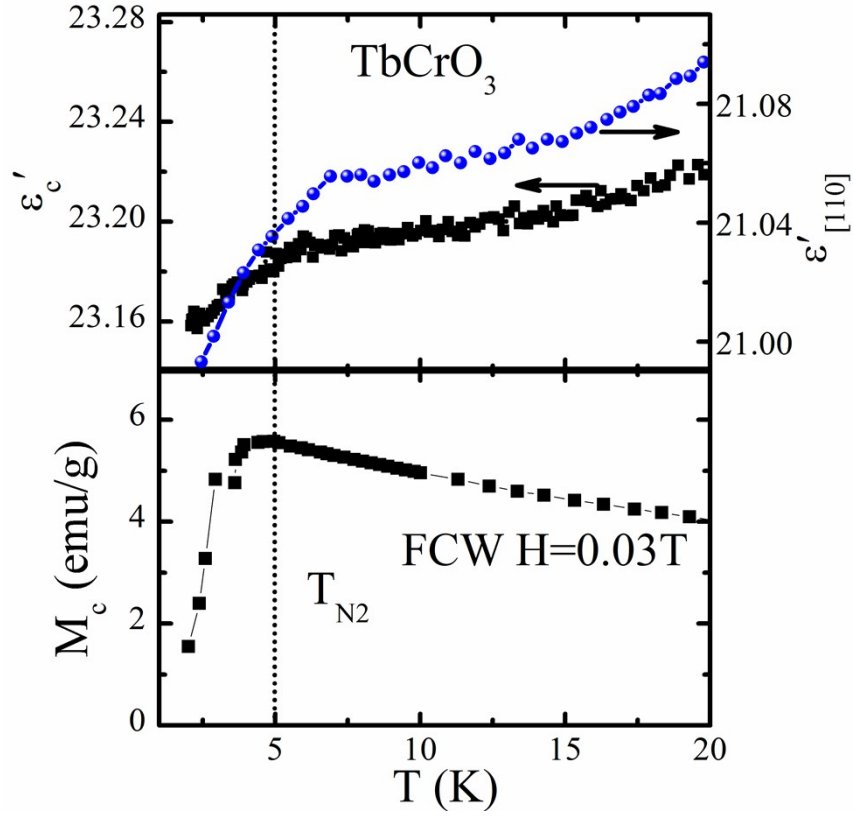

Figure S7 Dielectric constant as a function of temperature around  $T_{N2}$  along different axes for  $\text{TbCrO}_3$  crystals (Top panel), and corresponding temperature dependence of magnetization around  $T_{N2}$  along  $c$  axis for  $\text{TbCrO}_3$  crystals (Bottom panel).
